# Supplementary material for: Isomerization of the osmium–tellurium cluster Os3(μ-TeR)2(CO)10: a kinetic and computational study
Source: Royal Society of Chemistry journal article supplement (doi:10.1039/c6dt00588h), 2016-01-01

## Supporting Information

Experimental procedure for the preparation of **3-Tol-p** and **4-Tol-p**.

**Table S1.** Crystal and refinement data for **4-Tol-p**.

**Table S2.** Selected natural charges and Wiberg bond indices for species **A1-D** and associated transition structures for the conversion of cluster **B** to **A1**.

**Figure S1:** Graph of  $\ln[I_3/(I_3+I_4)]$  vs reaction time at 25°C.

**Figure S2:** Graph of  $\ln[I_3/(I_3+I_4)]$  vs reaction time at 35°C.

**Figure S3:** Graph of  $\ln[I_3/(I_3+I_4)]$  vs reaction time at 55°C.

**Figure S4:** Graph of  $\ln[I_3/(I_3+I_4)]$  vs reaction time at 65°C.

**Figure S5:** Graph of  $\ln[I_3/(I_3+I_4)]$  vs reaction time at 75°C.

**Figure S6:** Eyring plot for conversion of **3-Tol-p** to **4-Tol-p**.

**Figure S7.** M06-optimized structures for the conversion of **B** to **A1** and transition state structures **TSBC**, **TSCD**, **TSDA2**, **TSA2A1**, and **TSBA3**.

M06 geometries and energies for all optimized minima and transition structures.

IR and <sup>1</sup>H NMR spectra of **3-Tol-p**

IR and <sup>1</sup>H NMR spectra of **4-Tol-p**

Variable-temperature <sup>1</sup>H NMR spectrum of **4-Tol-p** from 25°C to 90°C in toluene-d<sub>8</sub>

Experimental procedure for the preparation of **3-Tol-p** and **4-Tol-p**.

Cluster **1** (150 mg, 0.159 mmol) and the ditelluride **2** (70 mg, 0.160 mmol) were stirred in DCM (15 mL) at room temperature for 1 h. Column chromatographic separation on silica gel using DCM and hexane (20:80, v/v) as eluent afforded **4-Tol-p** (9.5 mg, 7%) followed by **3-Tol-p** (80.6 mg, 60%).

**3-Tol-p**:  $\nu_{\text{CO}}/\text{cm}^{-1}$  (cyclohexane): 2105w, 2058s, 2041m, 2026s, 2010w, 1988w, 1971w, 1964w and 195w.  $^1\text{H NMR}$  ( $\text{CDCl}_3$ ): 6.9-7.5 (m, 8H, aromatic), 2.379 (s, 3H, Me), 2.362 (s, 3H, Me).

**4-Tol-p**:  $\nu_{\text{CO}}/\text{cm}^{-1}$  (DCM): 2098m, 2056vs, 2009s, 1980m.  $^1\text{H NMR}$  ( $\text{CDCl}_3$ ): 6.6-7.2 (m, 8H, aromatic), 2.289 (s, 6H, Me).

**Table S1.** Crystal and refinement data for **4-Tol-p**.

|                                   |                                                                                                                            |
|-----------------------------------|----------------------------------------------------------------------------------------------------------------------------|
| Empirical formula                 | C <sub>24</sub> H <sub>14</sub> O <sub>10</sub> Os <sub>3</sub> Te <sub>2</sub>                                            |
| Formula weight                    | 1288.15                                                                                                                    |
| Temperature                       | 103(2) K                                                                                                                   |
| Wavelength                        | 0.71073 Å                                                                                                                  |
| Crystal system                    | Tetragonal                                                                                                                 |
| Space group                       | I $\bar{4}2d$                                                                                                              |
| Unit cell dimensions              | a = 14.1313(6) Å $\alpha = 90^\circ$ .<br>b = 14.1313(6) Å $\beta = 90^\circ$ .<br>c = 28.8408(13) Å $\gamma = 90^\circ$ . |
| Volume                            | 5759.3(6) Å <sup>3</sup>                                                                                                   |
| Z                                 | 8                                                                                                                          |
| Density (calculated)              | 2.971 Mg/m <sup>3</sup>                                                                                                    |
| Absorption coefficient            | 15.242 mm <sup>-1</sup>                                                                                                    |
| F(000)                            | 4560                                                                                                                       |
| Crystal size                      | 0.240 x 0.200 x 0.180 mm <sup>3</sup>                                                                                      |
| Theta range for data collection   | 3.815 to 26.372°.                                                                                                          |
| Index ranges                      | -17 ≤ h ≤ 17, -17 ≤ k ≤ 17, -35 ≤ l ≤ 36                                                                                   |
| Reflections collected             | 35019                                                                                                                      |
| Independent reflections           | 2952 [R(int) = 0.0646]                                                                                                     |
| Completeness to theta = 25.242°   | 99.5 %                                                                                                                     |
| Absorption correction             | Semi-empirical from equivalents                                                                                            |
| Max. and min. transmission        | 0.170 and 0.121                                                                                                            |
| Refinement method                 | Full-matrix least-squares on F <sup>2</sup>                                                                                |
| Data / restraints / parameters    | 2952 / 0 / 178                                                                                                             |
| Goodness-of-fit on F <sup>2</sup> | 1.033                                                                                                                      |
| Final R indices [I > 2σ(I)]       | R1 = 0.0168, wR2 = 0.0355                                                                                                  |
| R indices (all data)              | R1 = 0.0180, wR2 = 0.0358                                                                                                  |
| Absolute structure parameter      | 0.000(4)                                                                                                                   |
| Largest diff. peak and hole       | 0.982 and -0.667 e.Å <sup>-3</sup>                                                                                         |

**Table S2.** Selected natural charges and Wiberg bond indices for species **A1-D** and associated transition structures for the conversion of cluster **B** to **A1**.<sup>a</sup>

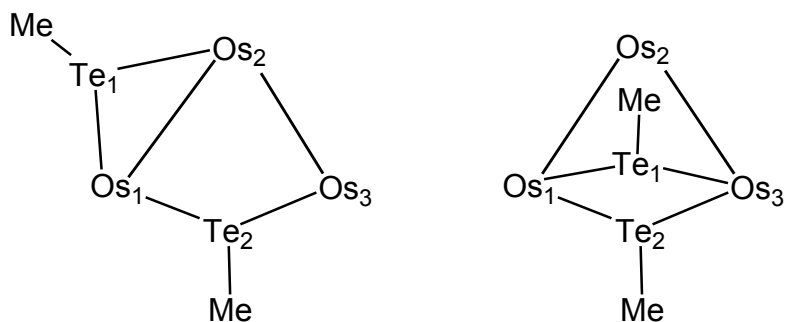

Natural Charge

| species       | Os <sub>1</sub> | Os <sub>2</sub> | Os <sub>3</sub> | Te <sub>1</sub> | Te <sub>2</sub> |
|---------------|-----------------|-----------------|-----------------|-----------------|-----------------|
| <b>B</b>      | -1.60           | -1.33           | -1.60           | 0.78            | 0.84            |
| <b>TSBC</b>   | -1.21           | -1.54           | -1.36           | 0.78            | 0.41            |
| <b>C</b>      | -1.31           | -1.28           | -1.53           | 0.81            | 0.37            |
| <b>TSCD</b>   | -1.20           | -1.37           | -1.51           | 0.79            | 0.37            |
| <b>D</b>      | -1.61           | -1.32           | -1.60           | 0.80            | 0.84            |
| <b>TSDA2</b>  | -1.57           | -1.26           | -1.45           | 0.84            | 0.82            |
| <b>A2</b>     | -1.55           | -1.40           | -1.55           | 0.75            | 0.82            |
| <b>TSA2A1</b> | -1.49           | -1.40           | -1.49           | 0.49            | 0.81            |
| <b>A1</b>     | -1.56           | -1.40           | -1.56           | 0.80            | 0.80            |
| <b>TSBA3</b>  | -1.55           | -1.22           | -1.48           | 0.83            | 0.78            |
| <b>A3</b>     | -1.51           | -1.40           | -1.51           | 0.75            | 0.75            |

**Table S2.** Con't.

## Wiberg bond indices

| species       | Os <sub>1</sub> -Os <sub>2</sub> | Os <sub>2</sub> -Os <sub>3</sub> | Os <sub>1</sub> -Os <sub>3</sub> | Os <sub>1</sub> -Te <sub>1</sub> | Os <sub>2</sub> -Te <sub>1</sub> | Os <sub>3</sub> -Te <sub>1</sub> | Os <sub>1</sub> -Te <sub>2</sub> | Os <sub>2</sub> -Te <sub>2</sub> | Os <sub>3</sub> -Te <sub>2</sub> |
|---------------|----------------------------------|----------------------------------|----------------------------------|----------------------------------|----------------------------------|----------------------------------|----------------------------------|----------------------------------|----------------------------------|
| <b>B</b>      | 0.47                             | 0.40                             | 0.04                             | 0.80                             | 0.79                             | 0.02                             | 0.77                             | 0.06                             | 0.77                             |
| <b>TSBC</b>   | 0.60                             | 0.33                             | 0.21                             | 0.78                             | 0.78                             | 0.03                             | 0.20                             | 0.03                             | 0.75                             |
| <b>C</b>      | 0.65                             | 0.28                             | 0.30                             | 0.79                             | 0.78                             | 0.04                             | 0.06                             | 0.01                             | 0.77                             |
| <b>TSCD</b>   | 0.61                             | 0.33                             | 0.21                             | 0.78                             | 0.78                             | 0.03                             | 0.18                             | 0.03                             | 0.73                             |
| <b>D</b>      | 0.47                             | 0.40                             | 0.03                             | 0.81                             | 0.79                             | 0.02                             | 0.77                             | 0.06                             | 0.77                             |
| <b>TSDA2</b>  | 0.47                             | 0.20                             | 0.03                             | 0.79                             | 0.44                             | 0.50                             | 0.76                             | 0.03                             | 0.77                             |
| <b>A2</b>     | 0.41                             | 0.41                             | 0.11                             | 0.76                             | 0.05                             | 0.76                             | 0.77                             | 0.07                             | 0.77                             |
| <b>TSA2A1</b> | 0.43                             | 0.43                             | 0.09                             | 0.71                             | 0.06                             | 0.71                             | 0.76                             | 0.08                             | 0.76                             |
| <b>A1</b>     | 0.42                             | 0.42                             | 0.10                             | 0.76                             | 0.07                             | 0.76                             | 0.76                             | 0.07                             | 0.76                             |
| <b>TSBA3</b>  | 0.47                             | 0.20                             | 0.03                             | 0.79                             | 0.38                             | 0.55                             | 0.76                             | 0.03                             | 0.78                             |
| <b>A3</b>     | 0.39                             | 0.39                             | 0.13                             | 0.76                             | 0.05                             | 0.75                             | 0.76                             | 0.05                             | 0.76                             |

<sup>a</sup> Atom numbers based on the numbering scheme for the different Os<sub>3</sub> clusters examined in this study.

The kinetics for the isomerization of **3-Tol-p** to **4-Tol-p** was obtained by monitoring the sum of the intensities for the two distinct methyl resonances at 2.379 and 2.362 ppm for the former (**I**<sub>3</sub>), against the single methyl resonance at 2.289 ppm for the latter (**I**<sub>4</sub>).

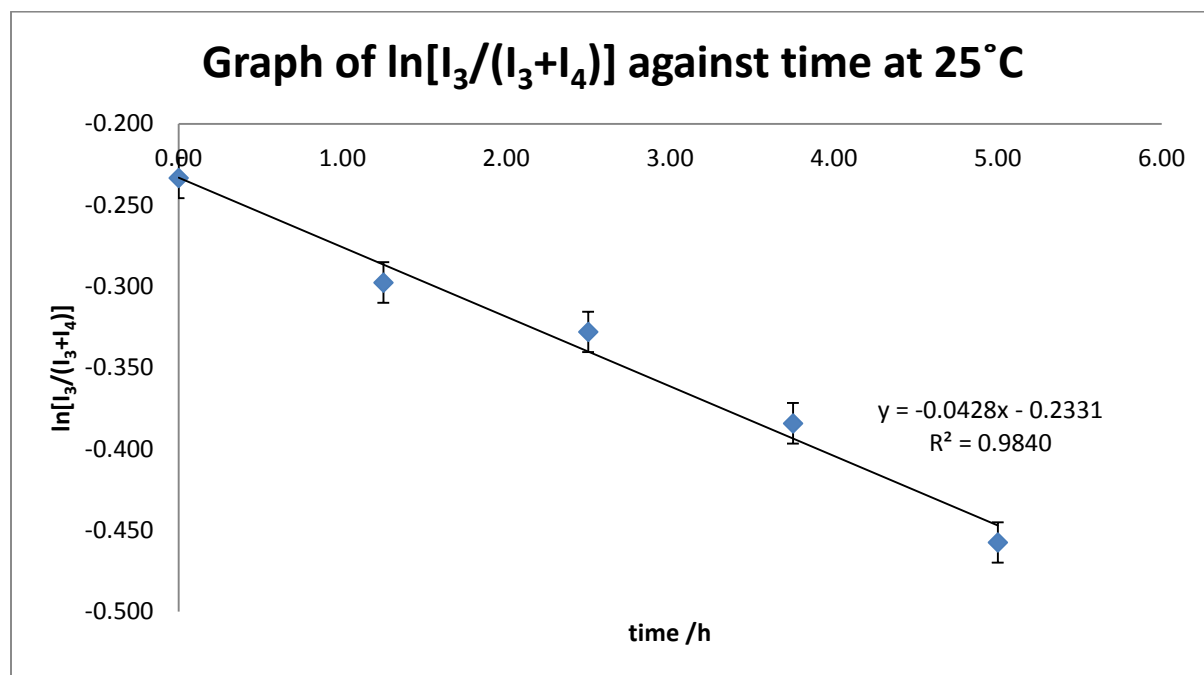

**Figure S1:** Graph of  $\ln[I_3/(I_3+I_4)]$  vs reaction time at 25°C.

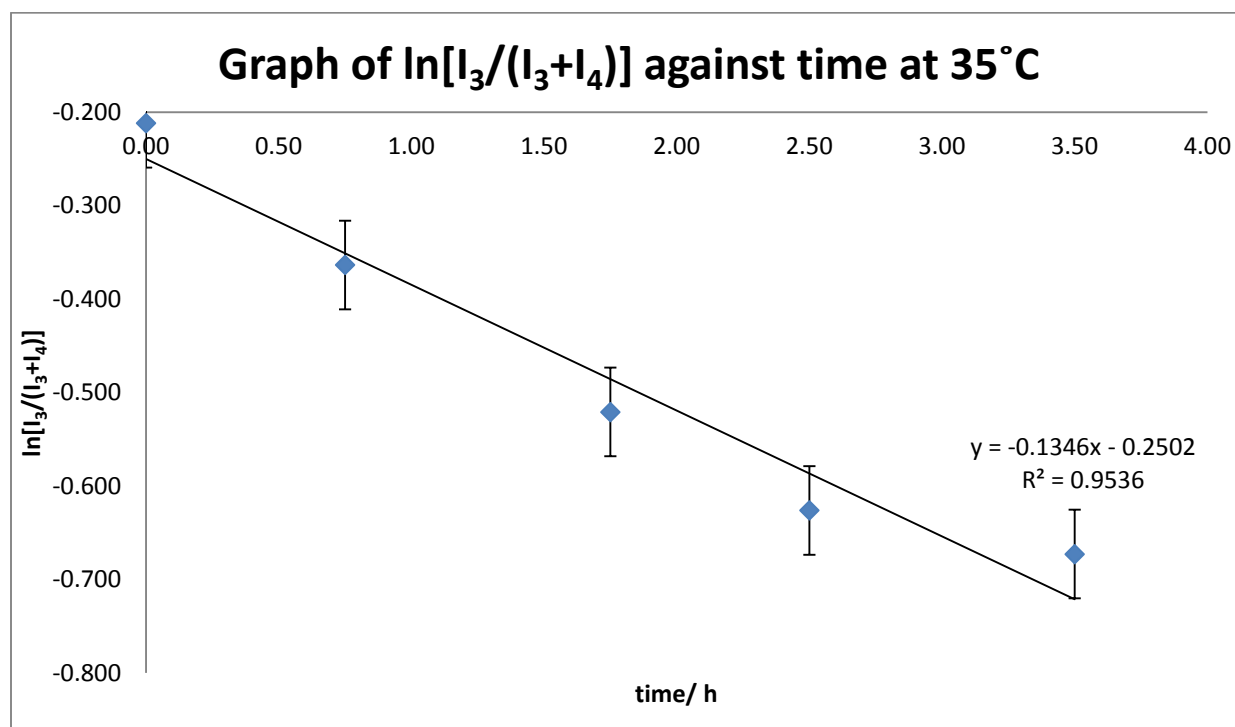

**Figure S2:** Graph of  $\ln[I_3/(I_3+I_4)]$  vs reaction time at 35°C.

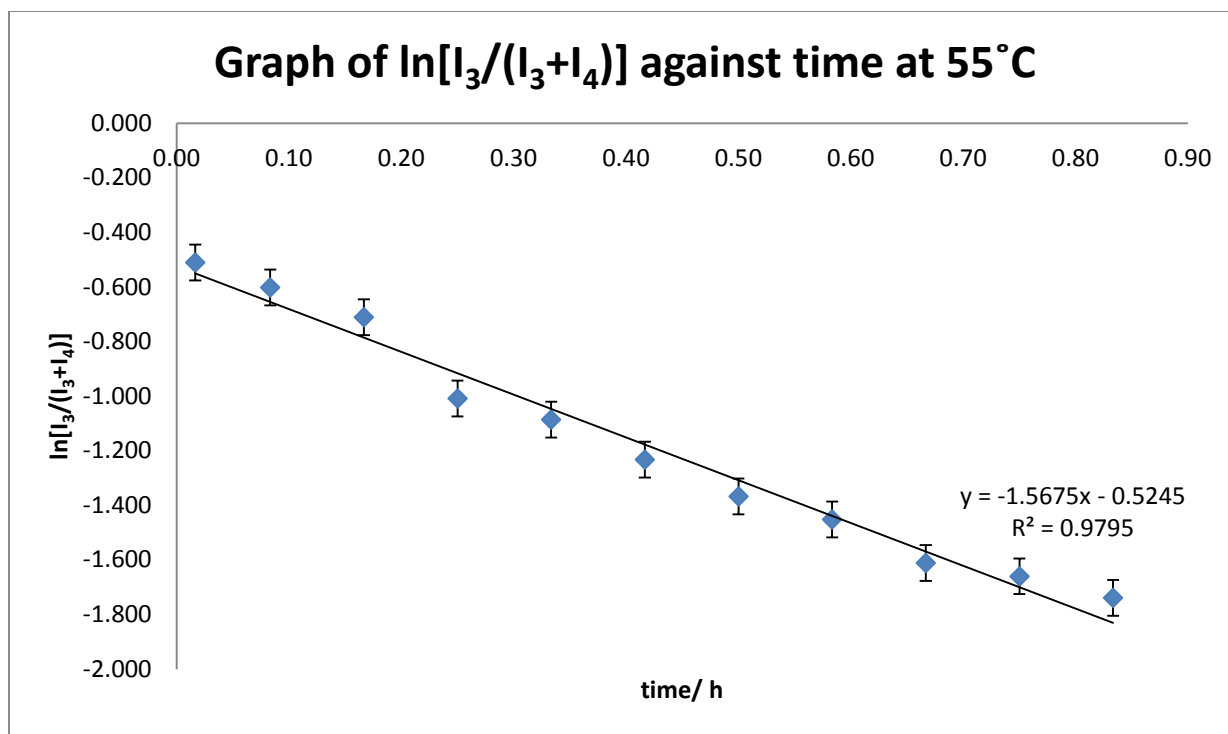

**Figure S3:** Graph of  $\ln[I_3/(I_3+I_4)]$  vs reaction time at 55°C.

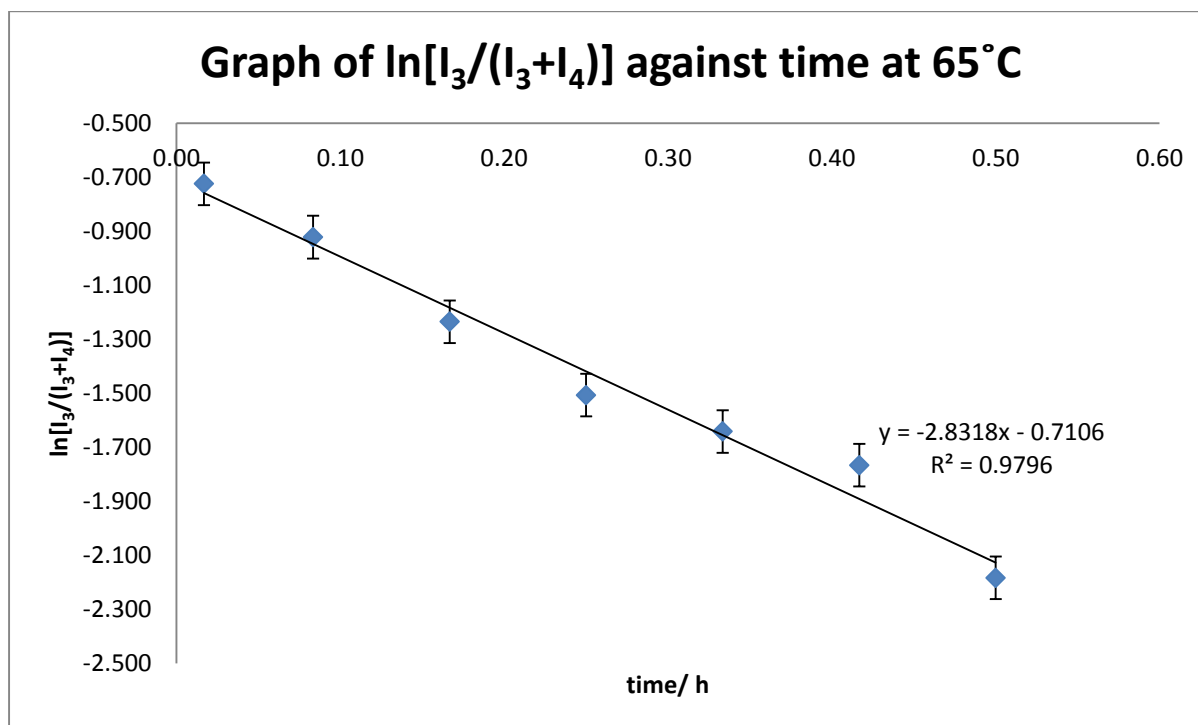

**Figure S4:** Graph of  $\ln[I_3/(I_3+I_4)]$  vs reaction time at 65°C.

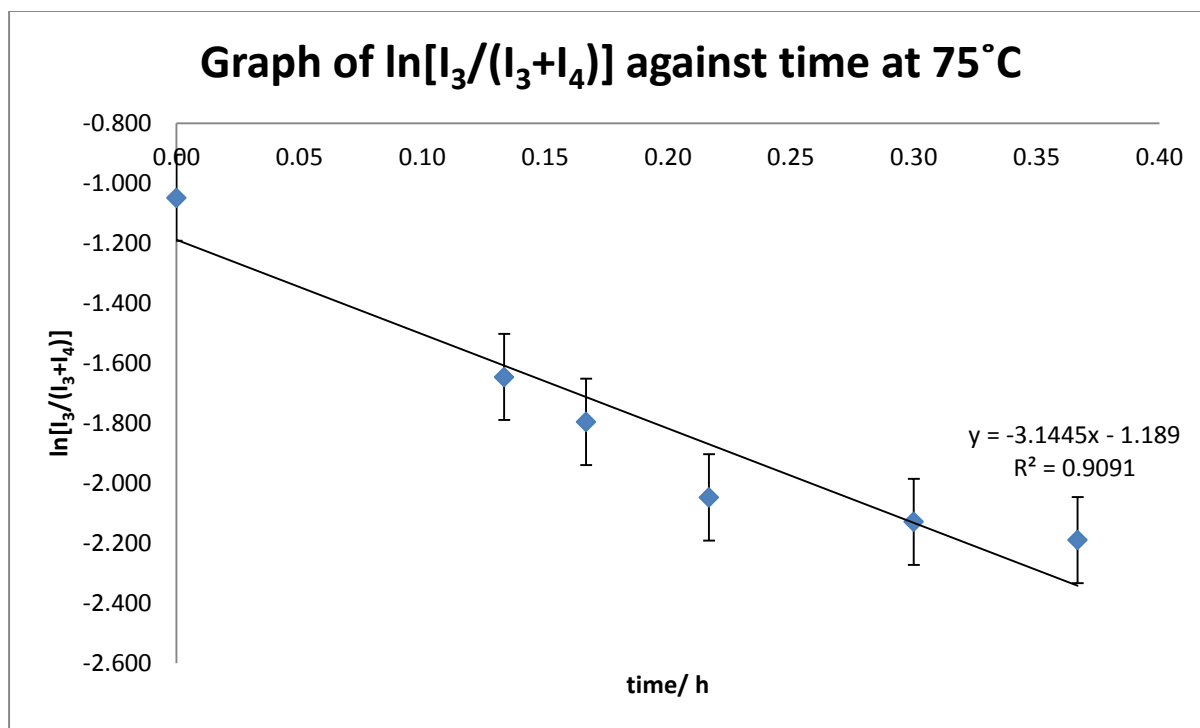

**Figure S5:** Graph of  $\ln[I_3/(I_3+I_4)]$  vs reaction time at 75°C.

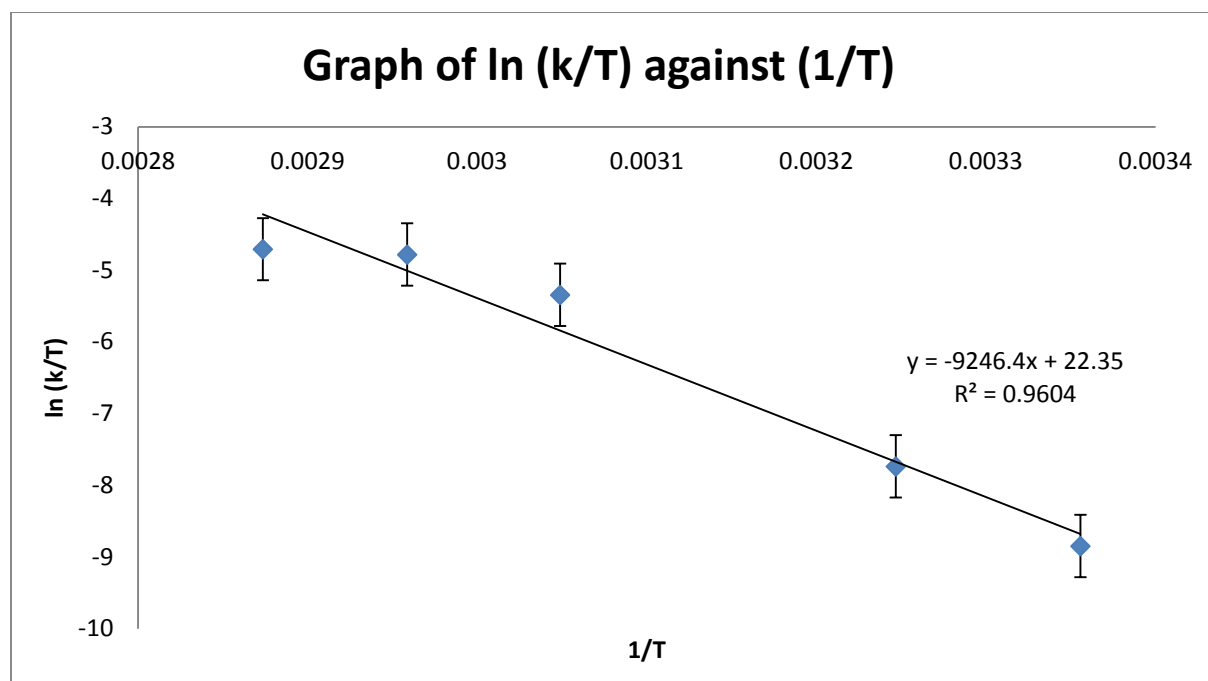

**Figure S6:** Eyring plot for conversion of 3-Tol-*p* to 4-Tol-*p*.



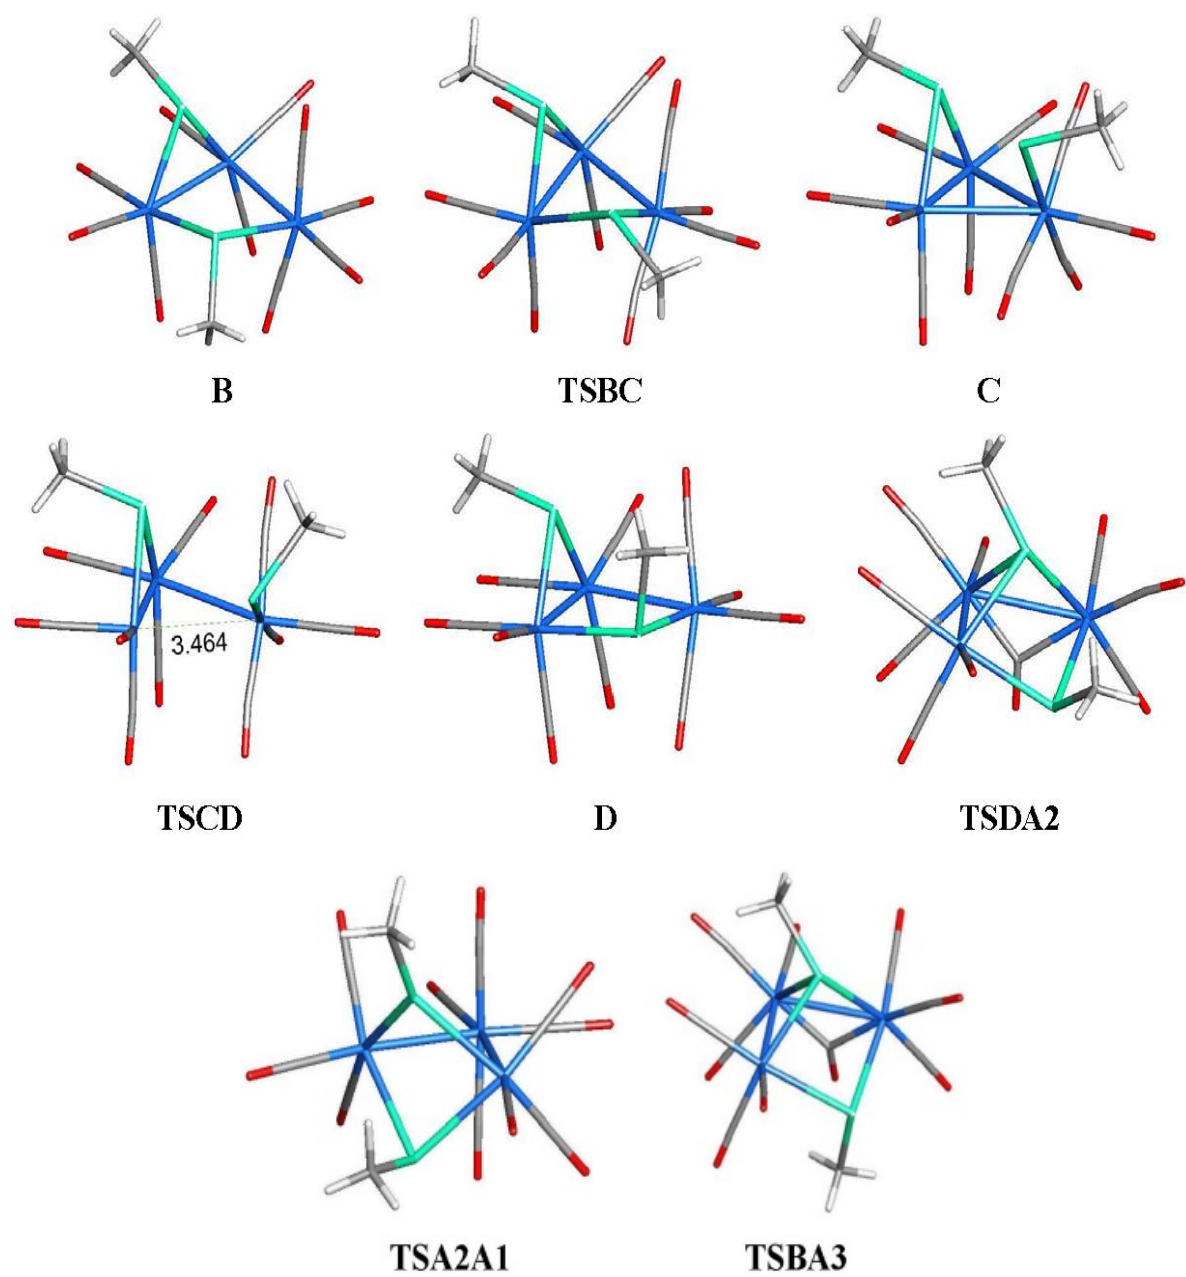

**Figure S7.** M06-optimized structures for the conversion of **B** to **A1** and transition state structures **TSBC**, **TSCD**, **TSDA2**, **TSA2A1**, and **TSBA3**.

## M06 geometries and energies for all optimized minima and transition structures

### Species A1

SCF Done: E(RM06) = -1501.13537888

No imaginary frequency

Zero-point correction = 0.162096 (Hartree/Particle)

Thermal correction to Energy = 0.198045

Thermal correction to Enthalpy = 0.198990

Thermal correction to Gibbs Free Energy = 0.089806

Sum of electronic and zero-point Energies = -1500.973283

Sum of electronic and thermal Energies = -1500.937333

Sum of electronic and thermal Enthalpies = -1500.936389

Sum of electronic and thermal Free Energies = -1501.045573

### Coordinates: A1

|    |             |             |             |
|----|-------------|-------------|-------------|
| Os | 1.62950000  | 4.69090000  | 8.50300000  |
| Os | -0.58340000 | 2.29040000  | 6.94380000  |
| Os | 1.38200000  | 1.75890000  | 9.16950000  |
| O  | 1.65410000  | 7.62180000  | 7.57980000  |
| O  | 4.65450000  | 4.16050000  | 8.48880000  |
| O  | 1.46180000  | 5.11490000  | 11.54050000 |
| O  | -2.49390000 | 3.15800000  | 4.69850000  |
| O  | -2.56910000 | 0.73930000  | 8.69960000  |
| O  | 0.62350000  | -0.21780000 | 5.64530000  |
| O  | 3.52050000  | 1.16030000  | 6.97950000  |
| O  | 3.56100000  | 2.02220000  | 11.34400000 |
| O  | -0.84880000 | 2.52620000  | 11.20970000 |
| O  | 0.55610000  | -1.21670000 | 9.26750000  |
| C  | 1.64380000  | 6.52490000  | 7.93040000  |
| C  | 3.52290000  | 4.36250000  | 8.49800000  |
| C  | 1.53180000  | 4.96060000  | 10.40350000 |
| C  | -1.77610000 | 2.82950000  | 5.53690000  |
| C  | -1.82710000 | 1.31620000  | 8.03770000  |
| C  | 0.16330000  | 0.71710000  | 6.13060000  |
| C  | 2.72140000  | 1.41010000  | 7.76410000  |
| C  | 2.75120000  | 1.93120000  | 10.53420000 |
| C  | -0.04190000 | 2.26950000  | 10.43530000 |
| C  | 0.85830000  | -0.10910000 | 9.22500000  |
| Te | -1.17180000 | 4.58830000  | 8.44020000  |
| Te | 1.53140000  | 3.77460000  | 5.85480000  |
| C  | -1.79910000 | 6.10490000  | 7.03320000  |
| H  | -0.93880000 | 6.62490000  | 6.60180000  |
| H  | -2.40210000 | 5.64720000  | 6.24060000  |
| H  | -2.41570000 | 6.81990000  | 7.58890000  |
| C  | 0.61860000  | 5.34930000  | 4.68920000  |
| H  | 0.96500000  | 6.32450000  | 5.05030000  |

|   |             |            |            |
|---|-------------|------------|------------|
| H | 0.94580000  | 5.21070000 | 3.65290000 |
| H | -0.47290000 | 5.29390000 | 4.73670000 |

### Species A2

SCF Done: E(RM06) = -1501.13223991

No imaginary frequency

Zero-point correction = 0.161996 (Hartree/Particle)

Thermal correction to Energy = 0.197985

Thermal correction to Enthalpy = 0.198930

Thermal correction to Gibbs Free Energy = 0.089351

Sum of electronic and zero-point Energies = -1500.970244

Sum of electronic and thermal Energies = -1500.934255

Sum of electronic and thermal Enthalpies = -1500.933310

Sum of electronic and thermal Free Energies = -1501.042889

### Coordinates: A2

|    |             |             |             |
|----|-------------|-------------|-------------|
| Os | 1.73330000  | 4.78540000  | 8.19760000  |
| Os | -0.48380000 | 2.42990000  | 6.61990000  |
| Os | 1.20620000  | 1.93800000  | 9.08370000  |
| O  | 2.31910000  | 7.59120000  | 7.08040000  |
| O  | 4.64370000  | 3.98870000  | 8.75120000  |
| O  | 1.02940000  | 5.54840000  | 11.08510000 |
| O  | -1.99500000 | 2.99900000  | 4.00140000  |
| O  | -2.83420000 | 1.45070000  | 8.33210000  |
| O  | 0.56820000  | -0.34870000 | 5.85530000  |
| O  | 3.53460000  | 0.99040000  | 7.23360000  |
| O  | 3.10350000  | 2.24930000  | 11.50160000 |
| O  | -1.16510000 | 3.01300000  | 10.78420000 |
| O  | 0.12580000  | -0.94170000 | 9.37070000  |
| C  | 2.08200000  | 6.54360000  | 7.49090000  |
| C  | 3.55100000  | 4.28320000  | 8.54780000  |
| C  | 1.31710000  | 5.25950000  | 10.00850000 |
| C  | -1.43230000 | 2.80500000  | 4.98530000  |
| C  | -1.94800000 | 1.79470000  | 7.68290000  |
| C  | 0.17390000  | 0.69130000  | 6.14710000  |
| C  | 2.67070000  | 1.36220000  | 7.89190000  |
| C  | 2.40680000  | 2.14450000  | 10.59360000 |
| C  | -0.30300000 | 2.65750000  | 10.11420000 |
| C  | 0.52430000  | 0.12920000  | 9.24710000  |
| Te | -0.95250000 | 5.10070000  | 7.39620000  |
| Te | 1.87040000  | 3.60560000  | 5.66190000  |
| C  | -2.26300000 | 5.19180000  | 9.11020000  |
| H  | -2.96820000 | 6.00350000  | 8.90270000  |
| H  | -2.80700000 | 4.25010000  | 9.23160000  |
| H  | -1.69650000 | 5.41620000  | 10.01930000 |
| C  | 1.17560000  | 5.15440000  | 4.32360000  |

|   |            |            |            |
|---|------------|------------|------------|
| H | 1.99840000 | 5.85980000 | 4.16060000 |
| H | 0.89830000 | 4.68550000 | 3.37250000 |
| H | 0.31140000 | 5.68730000 | 4.73600000 |

### Species A3

SCF Done: E(RM06) = -1501.12131002

No imaginary frequency

Zero-point correction = 0.162783 (Hartree/Particle)

Thermal correction to Energy = 0.198370

Thermal correction to Enthalpy = 0.199314

Thermal correction to Gibbs Free Energy = 0.091308

Sum of electronic and zero-point Energies = -1500.958527

Sum of electronic and thermal Energies = -1500.922940

Sum of electronic and thermal Enthalpies = -1500.921996

Sum of electronic and thermal Free Energies = -1501.030002

### Coordinates: A3

|    |             |             |             |
|----|-------------|-------------|-------------|
| Os | 1.75130000  | 4.76470000  | 8.15110000  |
| Os | -0.36540000 | 2.49420000  | 6.49180000  |
| Os | 1.10440000  | 1.94670000  | 9.10090000  |
| O  | 2.48010000  | 7.62980000  | 7.30290000  |
| O  | 4.62080000  | 3.81850000  | 8.66320000  |
| O  | 1.05710000  | 5.43840000  | 11.05960000 |
| O  | -1.90520000 | 2.92100000  | 3.86400000  |
| O  | -2.73930000 | 1.43630000  | 8.11550000  |
| O  | 0.82600000  | -0.22990000 | 5.74600000  |
| O  | 3.51920000  | 0.85960000  | 7.46780000  |
| O  | 2.90110000  | 2.23170000  | 11.59680000 |
| O  | -1.31890000 | 3.06130000  | 10.70350000 |
| O  | -0.05170000 | -0.90900000 | 9.31780000  |
| C  | 2.18340000  | 6.55630000  | 7.58550000  |
| C  | 3.53750000  | 4.16820000  | 8.48940000  |
| C  | 1.32530000  | 5.17230000  | 9.97210000  |
| C  | -1.31390000 | 2.80040000  | 4.84170000  |
| C  | -1.83610000 | 1.81530000  | 7.51000000  |
| C  | 0.37580000  | 0.78800000  | 6.04040000  |
| C  | 2.61870000  | 1.30410000  | 8.02490000  |
| C  | 2.23680000  | 2.14550000  | 10.66220000 |
| C  | -0.43690000 | 2.69410000  | 10.06640000 |
| C  | 0.36750000  | 0.15710000  | 9.21810000  |
| Te | -0.90390000 | 5.16510000  | 7.25660000  |
| Te | 1.83830000  | 3.93030000  | 5.44730000  |
| C  | -2.29180000 | 5.21020000  | 8.91110000  |
| H  | -2.80810000 | 4.25140000  | 9.01220000  |
| H  | -1.77560000 | 5.45960000  | 9.84280000  |
| H  | -3.01260000 | 5.99680000  | 8.66440000  |

|   |            |            |            |
|---|------------|------------|------------|
| C | 3.53100000 | 2.63290000 | 5.10380000 |
| H | 4.26700000 | 2.73220000 | 5.90670000 |
| H | 3.21020000 | 1.59080000 | 5.01730000 |
| H | 3.96580000 | 2.96780000 | 4.15630000 |

### Species B

SCF Done: E(RM06) = -1501.12167931

No imaginary frequency

Zero-point correction = 0.161374 (Hartree/Particle)

Thermal correction to Energy = 0.197661

Thermal correction to Enthalpy = 0.198605

Thermal correction to Gibbs Free Energy = 0.087911

Sum of electronic and zero-point Energies = -1500.960305

Sum of electronic and thermal Energies = -1500.924018

Sum of electronic and thermal Enthalpies = -1500.923074

Sum of electronic and thermal Free Energies = -1501.033768

### Coordinates: B

|    |             |             |             |
|----|-------------|-------------|-------------|
| Os | 4.42950000  | 8.29590000  | 15.23300000 |
| Os | 2.41390000  | 6.12190000  | 14.38030000 |
| Os | 2.03700000  | 7.53100000  | 11.80920000 |
| Te | 4.36180000  | 8.91820000  | 12.51020000 |
| Te | 3.75100000  | 5.37280000  | 12.06230000 |
| O  | 3.96010000  | 7.23900000  | 18.09420000 |
| O  | 2.04230000  | 10.29520000 | 15.46970000 |
| O  | 6.60380000  | 10.42310000 | 15.81880000 |
| O  | 6.40680000  | 5.98060000  | 14.55110000 |
| O  | 0.20410000  | 4.12160000  | 13.71680000 |
| O  | 0.51820000  | 7.69400000  | 16.20730000 |
| O  | 3.77890000  | 4.29270000  | 16.45110000 |
| O  | 2.36270000  | 8.63600000  | 8.94460000  |
| O  | 0.24320000  | 9.65620000  | 13.10610000 |
| O  | -0.32320000 | 5.71560000  | 11.09260000 |
| C  | 4.15180000  | 7.62000000  | 17.03050000 |
| C  | 2.89410000  | 9.53530000  | 15.39050000 |
| C  | 5.79160000  | 9.64730000  | 15.58640000 |
| C  | 5.65950000  | 6.81500000  | 14.79400000 |
| C  | 1.03880000  | 4.88850000  | 13.92740000 |
| C  | 1.24870000  | 7.12830000  | 15.51640000 |
| C  | 3.28150000  | 4.98970000  | 15.68070000 |
| C  | 2.26930000  | 8.20330000  | 10.00740000 |
| C  | 0.92100000  | 8.85810000  | 12.62440000 |
| C  | 0.55870000  | 6.39860000  | 11.37760000 |
| C  | 2.66580000  | 3.64670000  | 11.34940000 |
| H  | 3.08460000  | 3.36980000  | 10.37630000 |

|   |            |             |             |
|---|------------|-------------|-------------|
| H | 2.81720000 | 2.83000000  | 12.06340000 |
| H | 1.59750000 | 3.85790000  | 11.24770000 |
| C | 3.74650000 | 10.98370000 | 12.54230000 |
| H | 4.50720000 | 11.56640000 | 13.07530000 |
| H | 3.68320000 | 11.32260000 | 11.50210000 |
| H | 2.77170000 | 11.09970000 | 13.02710000 |

### Species TSBC

SCF Done: E(RM06) = -1501.08269217

One imaginary frequency (41i)

Zero-point correction= 0.161017 (Hartree/Particle)

Thermal correction to Energy= 0.196638

Thermal correction to Enthalpy= 0.197583

Thermal correction to Gibbs Free Energy= 0.088536

Sum of electronic and zero-point Energies= -1500.921675

Sum of electronic and thermal Energies= -1500.886054

Sum of electronic and thermal Enthalpies= -1500.885110

Sum of electronic and thermal Free Energies= -1500.994156

### Coordinates: TSBC

|    |             |             |             |
|----|-------------|-------------|-------------|
| Os | 1.48230000  | 4.61430000  | 8.55810000  |
| Os | 0.43730000  | 2.18210000  | 6.34670000  |
| Os | -0.35110000 | 2.68150000  | 9.34480000  |
| O  | 2.85320000  | 7.00380000  | 7.11890000  |
| O  | 4.00710000  | 3.02780000  | 9.29260000  |
| O  | 1.62490000  | 6.00770000  | 11.22850000 |
| O  | -2.65180000 | 2.60940000  | 6.18670000  |
| O  | 0.24160000  | -0.62280000 | 7.61480000  |
| O  | 0.43660000  | 0.98460000  | 3.50710000  |
| O  | 3.55780000  | 2.34290000  | 6.26310000  |
| O  | 1.83720000  | 0.69560000  | 10.16450000 |
| O  | -0.79720000 | 3.55000000  | 12.22830000 |
| O  | -2.82200000 | 0.81550000  | 9.18830000  |
| C  | 2.31480000  | 6.10150000  | 7.57950000  |
| C  | 3.05860000  | 3.59750000  | 8.98030000  |
| C  | 1.58340000  | 5.48110000  | 10.20300000 |
| C  | -1.52410000 | 2.45750000  | 6.30410000  |
| C  | 0.31400000  | 0.45070000  | 7.21640000  |
| C  | 0.46040000  | 1.46090000  | 4.54840000  |
| C  | 2.42170000  | 2.29800000  | 6.40000000  |
| C  | 1.01540000  | 1.43530000  | 9.84060000  |
| C  | -0.62820000 | 3.21190000  | 11.13890000 |
| C  | -1.92090000 | 1.52880000  | 9.23700000  |
| Te | -1.23630000 | 5.14330000  | 8.42190000  |
| Te | 0.58620000  | 4.75100000  | 5.10460000  |
| C  | -1.59410000 | 6.35490000  | 10.17720000 |

|   |             |            |             |
|---|-------------|------------|-------------|
| H | -1.22930000 | 5.86520000 | 11.08510000 |
| H | -1.08630000 | 7.31660000 | 10.04440000 |
| H | -2.67440000 | 6.51810000 | 10.25400000 |
| C | 1.64180000  | 4.14890000 | 3.30970000  |
| H | 1.90730000  | 5.07080000 | 2.77950000  |
| H | 2.56300000  | 3.61300000 | 3.56570000  |
| H | 1.00740000  | 3.53160000 | 2.66510000  |

### Species C

SCF Done: E(RM06) = -1501.08546118

No imaginary frequency

Zero-point correction = 0.161236 (Hartree/Particle)

Thermal correction to Energy = 0.197637

Thermal correction to Enthalpy = 0.198581

Thermal correction to Gibbs Free Energy = 0.086523

Sum of electronic and zero-point Energies = -1500.924225

Sum of electronic and thermal Energies = -1500.887824

Sum of electronic and thermal Enthalpies = -1500.886880

Sum of electronic and thermal Free Energies = -1500.998938

### Coordinates: C

|    |             |             |             |
|----|-------------|-------------|-------------|
| Os | 1.68030000  | 4.38250000  | 8.75570000  |
| Os | 0.94950000  | 2.35920000  | 6.39750000  |
| Os | -0.46310000 | 2.75070000  | 9.28070000  |
| O  | 3.49150000  | 6.45380000  | 7.31260000  |
| O  | 3.83210000  | 2.41600000  | 9.71390000  |
| O  | 1.69970000  | 5.86800000  | 11.40230000 |
| O  | -2.12230000 | 2.57700000  | 5.87240000  |
| O  | 1.04730000  | -0.41390000 | 7.74580000  |
| O  | 1.30500000  | 0.99010000  | 3.66030000  |
| O  | 4.02880000  | 2.88820000  | 6.39220000  |
| O  | 1.24920000  | 0.62760000  | 10.69630000 |
| O  | -1.44280000 | 3.73710000  | 11.97500000 |
| O  | -3.02870000 | 1.10940000  | 8.69830000  |
| C  | 2.79890000  | 5.67870000  | 7.79890000  |
| C  | 3.02350000  | 3.14770000  | 9.34570000  |
| C  | 1.71440000  | 5.32120000  | 10.38770000 |
| C  | -1.01820000 | 2.49220000  | 6.16460000  |
| C  | 0.99700000  | 0.65600000  | 7.33410000  |
| C  | 1.16680000  | 1.52130000  | 4.66410000  |
| C  | 2.89950000  | 2.72840000  | 6.49780000  |
| C  | 0.62890000  | 1.40410000  | 10.11800000 |
| C  | -1.08770000 | 3.34310000  | 10.95230000 |
| C  | -2.08940000 | 1.73800000  | 8.90440000  |
| Te | -0.89720000 | 5.28090000  | 8.24050000  |
| Te | 0.90740000  | 4.82120000  | 4.96340000  |

|   |             |            |             |
|---|-------------|------------|-------------|
| C | -1.46170000 | 6.42780000 | 9.99020000  |
| H | -0.81000000 | 6.22820000 | 10.84600000 |
| H | -1.40580000 | 7.48910000 | 9.72430000  |
| H | -2.49570000 | 6.17250000 | 10.24890000 |
| C | 0.33300000  | 4.08070000 | 3.01080000  |
| H | 0.10800000  | 4.96560000 | 2.40370000  |
| H | 1.14210000  | 3.51940000 | 2.53300000  |
| H | -0.57330000 | 3.46710000 | 3.07890000  |

### Species TSCD

SCF Done: E(RM06) = -1501.07830268

One imaginary frequency (50i)

Zero-point correction = 0.161274 (Hartree/Particle)

Thermal correction to Energy = 0.196764

Thermal correction to Enthalpy = 0.197708

Thermal correction to Gibbs Free Energy = 0.088853

Sum of electronic and zero-point Energies = -1500.917029

Sum of electronic and thermal Energies = -1500.881539

Sum of electronic and thermal Enthalpies = -1500.880595

Sum of electronic and thermal Free Energies = -1500.989449

### Coordinates: TSCD

|    |             |             |             |
|----|-------------|-------------|-------------|
| Os | 1.75680000  | 4.46480000  | 8.74380000  |
| Os | 0.99390000  | 2.03720000  | 6.39310000  |
| Os | -0.39400000 | 2.76490000  | 9.11300000  |
| O  | 3.43020000  | 6.86740000  | 7.69800000  |
| O  | 4.00750000  | 2.72370000  | 9.89870000  |
| O  | 1.40140000  | 5.62370000  | 11.50380000 |
| O  | -1.88030000 | 2.94090000  | 5.56660000  |
| O  | -0.02450000 | -0.66270000 | 7.47390000  |
| O  | 1.57550000  | 0.97560000  | 3.55560000  |
| O  | 3.97500000  | 1.49740000  | 7.14700000  |
| O  | 1.43840000  | 0.59880000  | 10.28210000 |
| O  | -1.38070000 | 3.69930000  | 11.84180000 |
| O  | -2.95280000 | 1.16550000  | 8.41640000  |
| C  | 2.81470000  | 5.95420000  | 8.01860000  |
| C  | 3.17340000  | 3.34800000  | 9.41290000  |
| C  | 1.55730000  | 5.18820000  | 10.44670000 |
| C  | -0.84210000 | 2.63280000  | 5.94000000  |
| C  | 0.34810000  | 0.36600000  | 7.13040000  |
| C  | 1.38190000  | 1.37660000  | 4.61000000  |
| C  | 2.87280000  | 1.72670000  | 6.94740000  |
| C  | 0.73830000  | 1.39990000  | 9.83850000  |
| C  | -1.01270000 | 3.34420000  | 10.80930000 |
| C  | -2.01260000 | 1.77810000  | 8.67110000  |
| Te | -0.78660000 | 5.29210000  | 8.03880000  |



|    |             |            |             |
|----|-------------|------------|-------------|
| Te | 1.95900000  | 4.47930000 | 5.18460000  |
| C  | -1.52920000 | 6.44760000 | 9.70930000  |
| H  | -2.53060000 | 6.08400000 | 9.96420000  |
| H  | -0.87500000 | 6.36390000 | 10.58240000 |
| H  | -1.58860000 | 7.49420000 | 9.39200000  |
| C  | 0.48170000  | 4.54030000 | 3.60090000  |
| H  | 0.81190000  | 5.32140000 | 2.90640000  |
| H  | 0.43220000  | 3.58530000 | 3.06510000  |
| H  | -0.50420000 | 4.80900000 | 3.99540000  |

### Species D

SCF Done: E(RM06) = -1501.11916260

No imaginary frequency

Zero-point correction = 0.161908 (Hartree/Particle)

Thermal correction to Energy = 0.197841

Thermal correction to Enthalpy = 0.198785

Thermal correction to Gibbs Free Energy = 0.089291

Sum of electronic and zero-point Energies = -1500.957255

Sum of electronic and thermal Energies = -1500.921322

Sum of electronic and thermal Enthalpies = -1500.920378

Sum of electronic and thermal Free Energies = -1501.029872

### Coordinates: D

|    |             |             |             |
|----|-------------|-------------|-------------|
| Os | 1.72400000  | 5.05870000  | 8.34480000  |
| Os | 0.76290000  | 1.43490000  | 6.28460000  |
| Os | 0.00600000  | 2.73050000  | 8.98280000  |
| O  | 2.86570000  | 7.63950000  | 7.09450000  |
| O  | 4.22090000  | 3.49750000  | 9.22700000  |
| O  | 1.30150000  | 6.30490000  | 11.11060000 |
| O  | -2.02180000 | 2.62860000  | 5.55540000  |
| O  | -0.48930000 | -1.14030000 | 7.43420000  |
| O  | 1.36290000  | 0.41090000  | 3.42290000  |
| O  | 3.58620000  | 0.77580000  | 7.45300000  |
| O  | 2.01620000  | 0.70800000  | 10.11260000 |
| O  | -0.49990000 | 3.85170000  | 11.77690000 |
| O  | -2.55330000 | 1.01680000  | 8.95260000  |
| C  | 2.41710000  | 6.68500000  | 7.55700000  |
| C  | 3.28940000  | 4.08420000  | 8.88890000  |
| C  | 1.46150000  | 5.81860000  | 10.07960000 |
| C  | -1.00120000 | 2.20670000  | 5.86720000  |
| C  | -0.03600000 | -0.17910000 | 7.00550000  |
| C  | 1.16620000  | 0.80590000  | 4.48120000  |
| C  | 2.53670000  | 0.99630000  | 7.05570000  |
| C  | 1.27690000  | 1.46590000  | 9.65520000  |
| C  | -0.29570000 | 3.46250000  | 10.71110000 |
| C  | -1.58600000 | 1.64200000  | 8.94330000  |

|    |             |            |             |
|----|-------------|------------|-------------|
| Te | -0.98400000 | 5.06580000 | 7.86910000  |
| Te | 2.05930000  | 3.87480000 | 5.83270000  |
| C  | -1.87800000 | 6.14490000 | 9.51020000  |
| H  | -2.88500000 | 5.74430000 | 9.66880000  |
| H  | -1.29200000 | 6.04780000 | 10.42860000 |
| H  | -1.94320000 | 7.19950000 | 9.22170000  |
| C  | 0.71840000  | 4.92470000 | 4.51310000  |
| H  | 1.08430000  | 5.95500000 | 4.42880000  |
| H  | 0.75310000  | 4.43570000 | 3.53290000  |
| H  | -0.30750000 | 4.93030000 | 4.89540000  |

### Species TSDA2

SCF Done: E(RM06) = -1501.08508025

One imaginary frequency (*85i*)

Zero-point correction = 0.162260 (Hartree/Particle)

Thermal correction to Energy = 0.196812

Thermal correction to Enthalpy = 0.197756

Thermal correction to Gibbs Free Energy = 0.092589

Sum of electronic and zero-point Energies = -1500.922820

Sum of electronic and thermal Energies = -1500.888269

Sum of electronic and thermal Enthalpies = -1500.887325

Sum of electronic and thermal Free Energies = -1500.992491

### Coordinates: TSDA2

|    |             |             |             |
|----|-------------|-------------|-------------|
| Os | 1.79530000  | 4.89470000  | 8.27740000  |
| Os | -0.08700000 | 1.97030000  | 6.20030000  |
| Os | 0.51810000  | 2.40730000  | 9.28840000  |
| O  | 2.30920000  | 7.61450000  | 6.91960000  |
| O  | 4.69700000  | 4.11550000  | 8.94740000  |
| O  | 1.19010000  | 6.08110000  | 11.03510000 |
| O  | -1.67030000 | 3.24910000  | 3.83430000  |
| O  | -2.37210000 | 0.17520000  | 7.20070000  |
| O  | 1.20750000  | -0.26250000 | 4.57320000  |
| O  | 2.40160000  | 0.69640000  | 7.58120000  |
| O  | 3.11490000  | 1.98690000  | 10.83120000 |
| O  | -0.81830000 | 3.65770000  | 11.82820000 |
| O  | -0.79830000 | -0.26590000 | 10.06790000 |
| C  | 2.11420000  | 6.59310000  | 7.41140000  |
| C  | 3.61170000  | 4.40150000  | 8.70640000  |
| C  | 1.42350000  | 5.62120000  | 10.00630000 |
| C  | -1.14830000 | 2.82350000  | 4.76350000  |
| C  | -1.51300000 | 0.83640000  | 6.82250000  |
| C  | 0.71530000  | 0.56990000  | 5.18910000  |
| C  | 1.43220000  | 1.36390000  | 7.73710000  |
| C  | 2.14210000  | 2.17910000  | 10.24940000 |
| C  | -0.40310000 | 3.29840000  | 10.81900000 |

|    |             |            |             |
|----|-------------|------------|-------------|
| C  | -0.35240000 | 0.74570000 | 9.75290000  |
| Te | -0.83480000 | 4.56080000 | 7.56320000  |
| Te | 2.14760000  | 3.62320000 | 5.76050000  |
| C  | -2.18410000 | 5.09210000 | 9.18070000  |
| H  | -2.72760000 | 4.20390000 | 9.51640000  |
| H  | -1.62500000 | 5.53660000 | 10.01000000 |
| H  | -2.88610000 | 5.82460000 | 8.76580000  |
| C  | 1.40520000  | 5.17020000 | 4.44920000  |
| H  | 2.15610000  | 5.96690000 | 4.39890000  |
| H  | 1.25850000  | 4.74070000 | 3.45180000  |
| H  | 0.45990000  | 5.57900000 | 4.82380000  |

### Species TSA2A1

SCF Done: E(RM06) = -1501.09557026

One imaginary frequency (185i)

Zero-point correction = 0.161181 (Hartree/Particle)

Thermal correction to Energy = 0.196814

Thermal correction to Enthalpy = 0.197758

Thermal correction to Gibbs Free Energy = 0.088705

Sum of electronic and zero-point Energies = -1500.934389

Sum of electronic and thermal Energies = -1500.898756

Sum of electronic and thermal Enthalpies = -1500.897812

Sum of electronic and thermal Free Energies = -1501.006866

### Coordinates: TSA2A1

|    |             |             |             |
|----|-------------|-------------|-------------|
| Os | 1.79530000  | 4.89470000  | 8.27740000  |
| Os | -0.08700000 | 1.97030000  | 6.20030000  |
| Os | 0.51810000  | 2.40730000  | 9.28840000  |
| O  | 2.30920000  | 7.61450000  | 6.91960000  |
| O  | 4.69700000  | 4.11550000  | 8.94740000  |
| O  | 1.19010000  | 6.08110000  | 11.03510000 |
| O  | -1.67030000 | 3.24910000  | 3.83430000  |
| O  | -2.37210000 | 0.17520000  | 7.20070000  |
| O  | 1.20750000  | -0.26250000 | 4.57320000  |
| O  | 2.40160000  | 0.69640000  | 7.58120000  |
| O  | 3.11490000  | 1.98690000  | 10.83120000 |
| O  | -0.81830000 | 3.65770000  | 11.82820000 |
| O  | -0.79830000 | -0.26590000 | 10.06790000 |
| C  | 2.11420000  | 6.59310000  | 7.41140000  |
| C  | 3.61170000  | 4.40150000  | 8.70640000  |
| C  | 1.42350000  | 5.62120000  | 10.00630000 |
| C  | -1.14830000 | 2.82350000  | 4.76350000  |
| C  | -1.51300000 | 0.83640000  | 6.82250000  |
| C  | 0.71530000  | 0.56990000  | 5.18910000  |
| C  | 1.43220000  | 1.36390000  | 7.73710000  |
| C  | 2.14210000  | 2.17910000  | 10.24940000 |

|    |             |            |             |
|----|-------------|------------|-------------|
| C  | -0.40310000 | 3.29840000 | 10.81900000 |
| C  | -0.35240000 | 0.74570000 | 9.75290000  |
| Te | -0.83480000 | 4.56080000 | 7.56320000  |
| Te | 2.14760000  | 3.62320000 | 5.76050000  |
| C  | -2.18410000 | 5.09210000 | 9.18070000  |
| H  | -2.72760000 | 4.20390000 | 9.51640000  |
| H  | -1.62500000 | 5.53660000 | 10.01000000 |
| H  | -2.88610000 | 5.82460000 | 8.76580000  |
| C  | 1.40520000  | 5.17020000 | 4.44920000  |
| H  | 2.15610000  | 5.96690000 | 4.39890000  |
| H  | 1.25850000  | 4.74070000 | 3.45180000  |
| H  | 0.45990000  | 5.57900000 | 4.82380000  |

### Species TSBA3

SCF Done: E(RM06) = -1501.07435777

One imaginary frequency (86i)

Zero-point correction = 0.160641 (Hartree/Particle)

Thermal correction to Energy = 0.196071

Thermal correction to Enthalpy = 0.197015

Thermal correction to Gibbs Free Energy = 0.088614

Sum of electronic and zero-point Energies = -1500.913717

Sum of electronic and thermal Energies = -1500.878287

Sum of electronic and thermal Enthalpies = -1500.877343

Sum of electronic and thermal Free Energies = -1500.985744

### Coordinates: TSBA3

|    |             |             |             |
|----|-------------|-------------|-------------|
| Os | 1.57070000  | 5.15770000  | 8.53620000  |
| Os | -0.43590000 | 2.41620000  | 6.37840000  |
| Os | 1.51770000  | 1.97320000  | 8.58700000  |
| O  | 2.26700000  | 7.61440000  | 6.73070000  |
| O  | 4.38990000  | 4.82730000  | 9.71980000  |
| O  | 0.48700000  | 6.82600000  | 10.84660000 |
| O  | -1.78390000 | 3.27810000  | 3.73940000  |
| O  | -2.93560000 | 1.33240000  | 7.79990000  |
| O  | 0.50100000  | -0.27890000 | 5.26470000  |
| O  | 2.92680000  | -0.47430000 | 7.24570000  |
| O  | 3.60100000  | 1.69560000  | 10.83910000 |
| O  | 0.13090000  | 3.57270000  | 10.78980000 |
| O  | -0.61530000 | 0.18230000  | 9.82260000  |
| C  | 2.02880000  | 6.66370000  | 7.32440000  |
| C  | 3.33690000  | 4.96300000  | 9.28330000  |
| C  | 0.91740000  | 6.20620000  | 9.98300000  |
| C  | -1.27950000 | 2.98450000  | 4.72860000  |
| C  | -1.98810000 | 1.71620000  | 7.27420000  |
| C  | 0.14810000  | 0.72550000  | 5.70100000  |
| C  | 2.43790000  | 0.50330000  | 7.60240000  |

|    |             |            |            |
|----|-------------|------------|------------|
| C  | 2.85630000  | 1.83140000 | 9.97380000 |
| C  | 0.73780000  | 3.48510000 | 9.77290000 |
| C  | 0.16810000  | 0.85100000 | 9.30780000 |
| Te | -1.02440000 | 4.98310000 | 7.44790000 |
| Te | 1.99000000  | 3.66770000 | 5.98120000 |
| C  | -2.28120000 | 4.55170000 | 9.15060000 |
| H  | -2.00900000 | 3.59550000 | 9.60590000 |
| H  | -2.15990000 | 5.35640000 | 9.88450000 |
| H  | -3.31400000 | 4.52680000 | 8.78600000 |
| C  | 3.50680000  | 2.23270000 | 5.38250000 |
| H  | 3.03980000  | 1.26550000 | 5.17170000 |
| H  | 3.96900000  | 2.63690000 | 4.47450000 |
| H  | 4.25550000  | 2.13290000 | 6.17380000 |

# IR and <sup>1</sup>H NMR spectra of 3-Tol-p

## IR spectrum (cyclohexane)

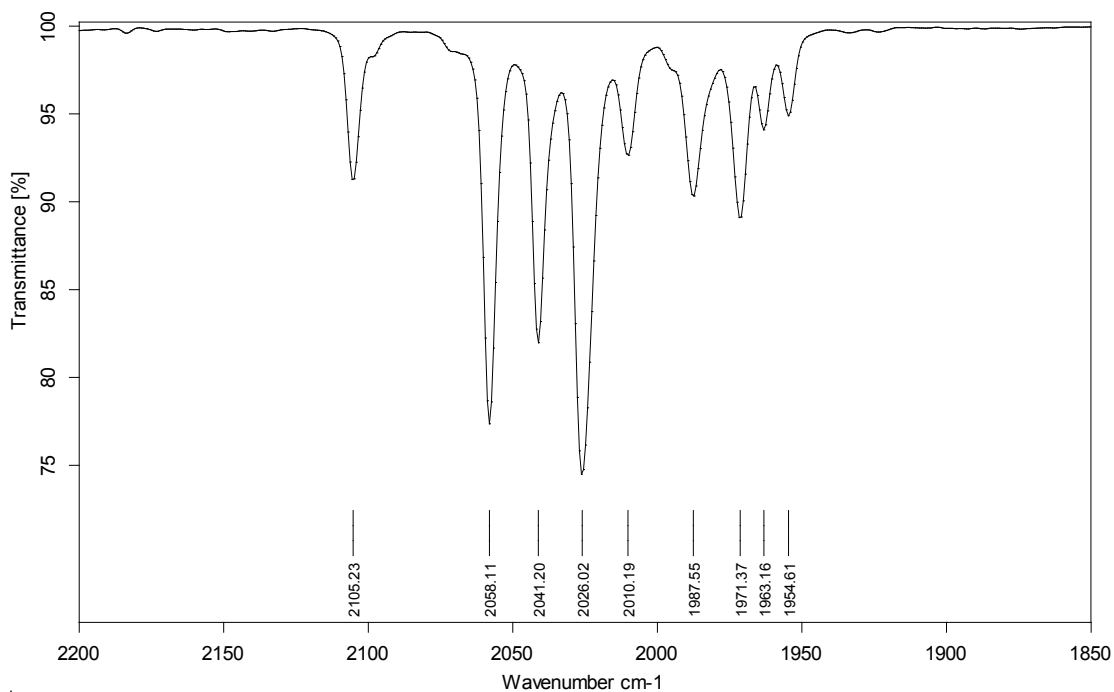

## <sup>1</sup>H NMR spectrum (CDCl<sub>3</sub>)

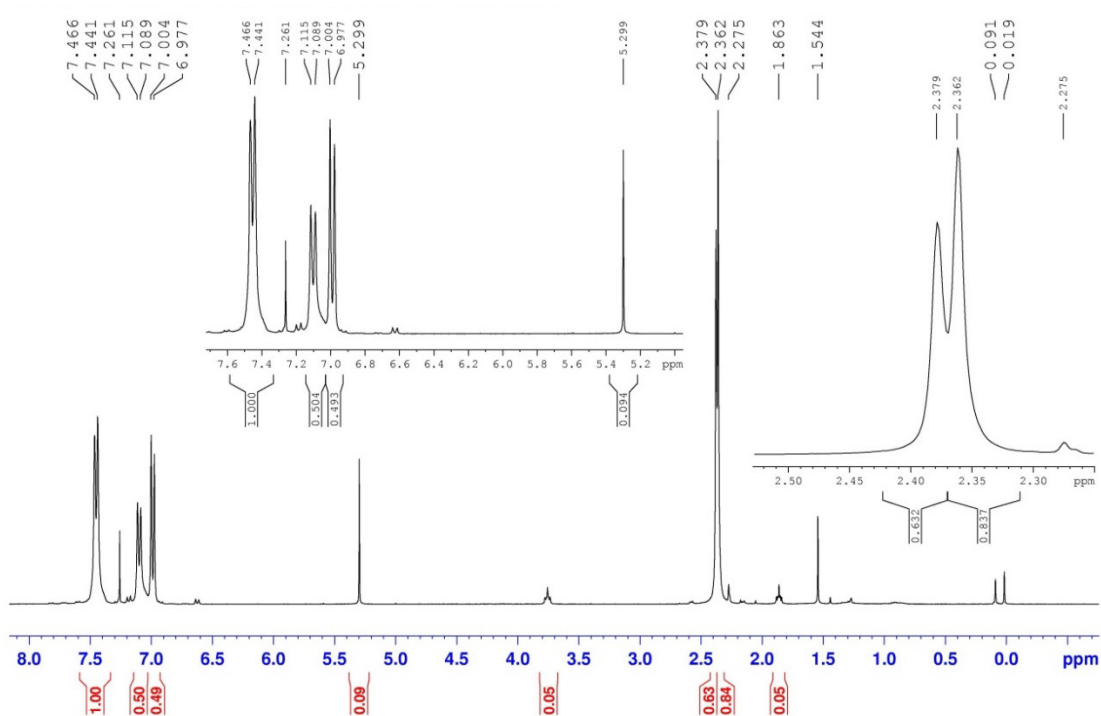

# IR and $^1\text{H}$ NMR spectra of **4-Tol-p**

*IR spectrum (hexane)*

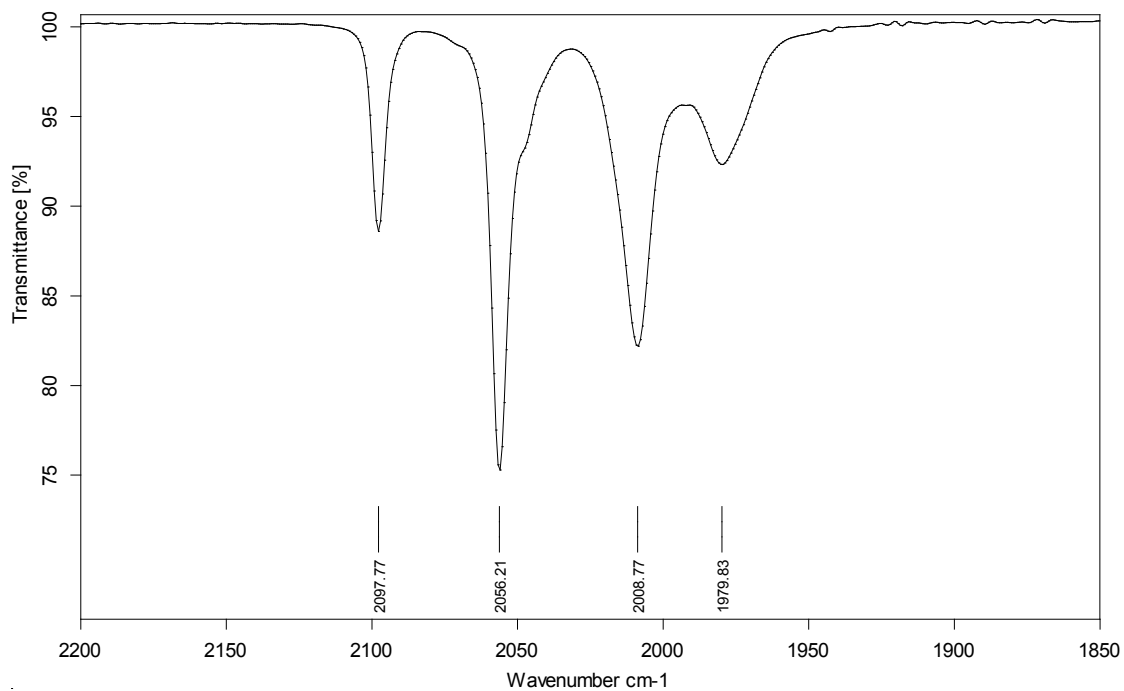

*$^1\text{H}$  NMR spectrum ( $\text{CDCl}_3$ )*

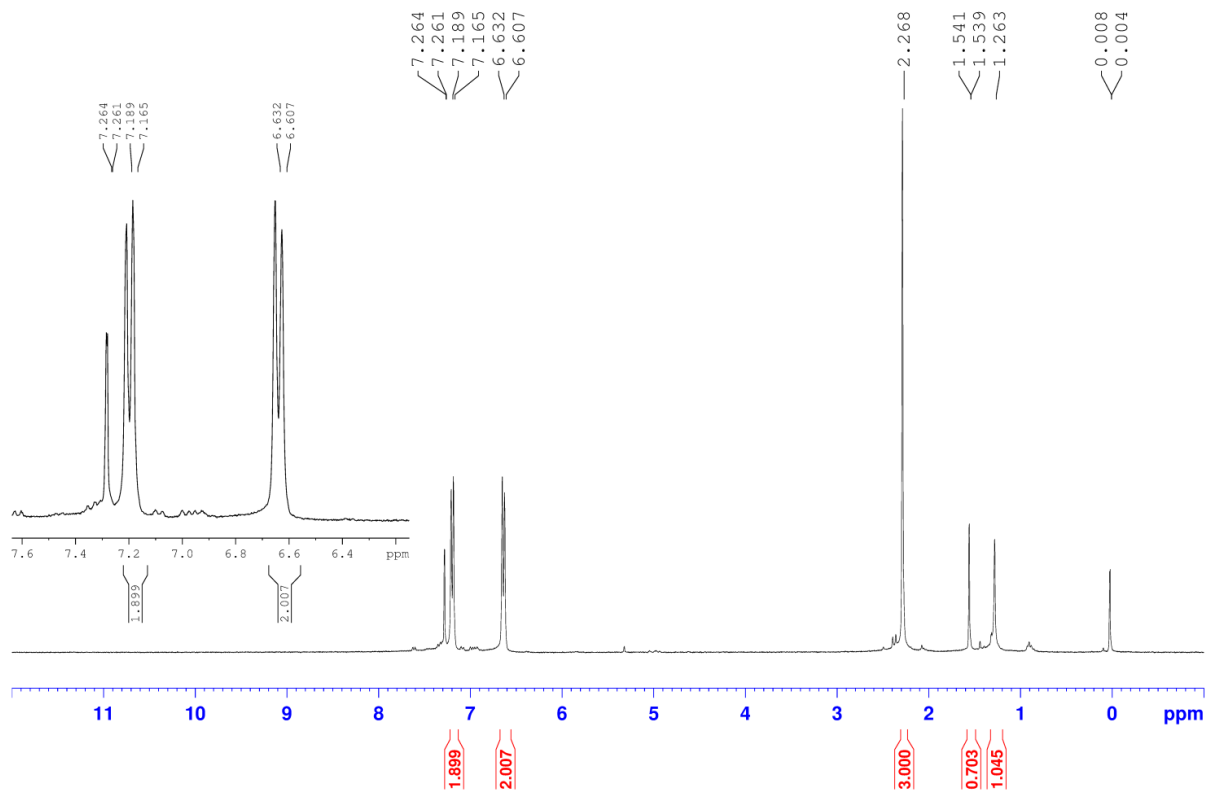

Variable-temperature  $^1\text{H}$  NMR spectrum of **4-Tol-*p*** from 25°C to 90°C in toluene- $\text{d}_8$

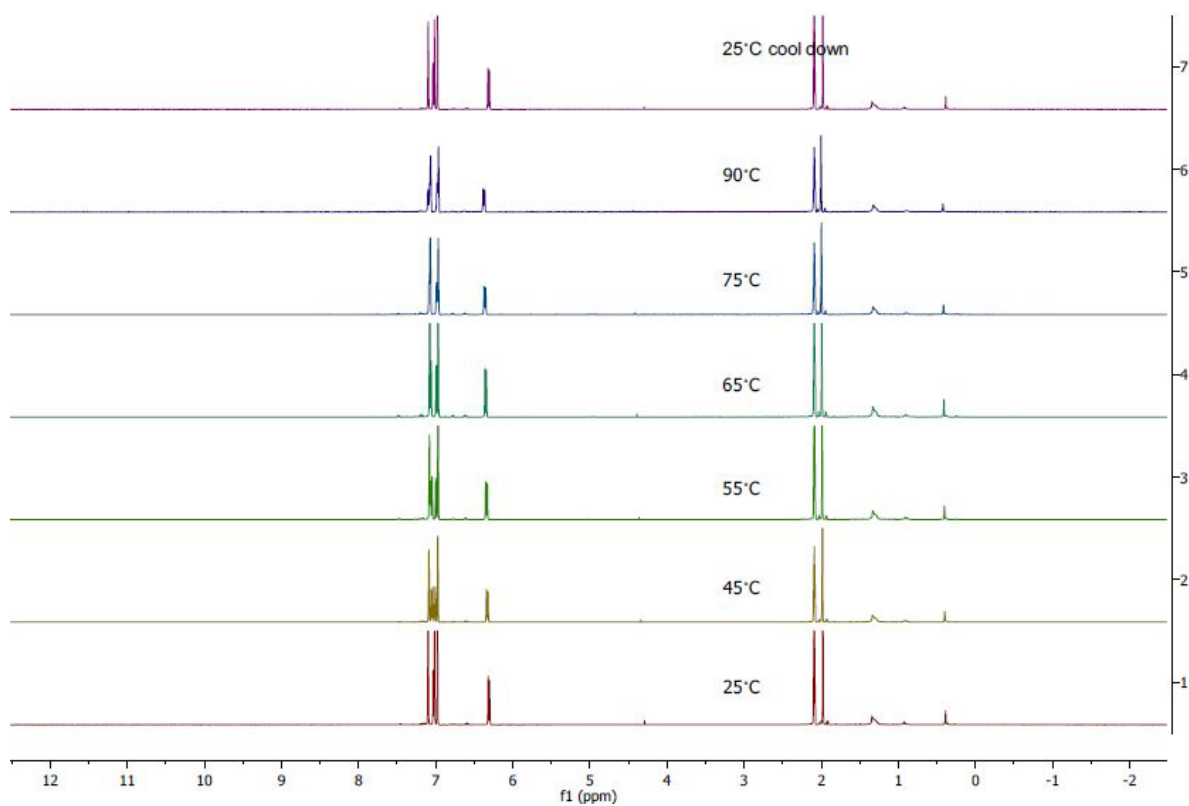

Methyl region only.

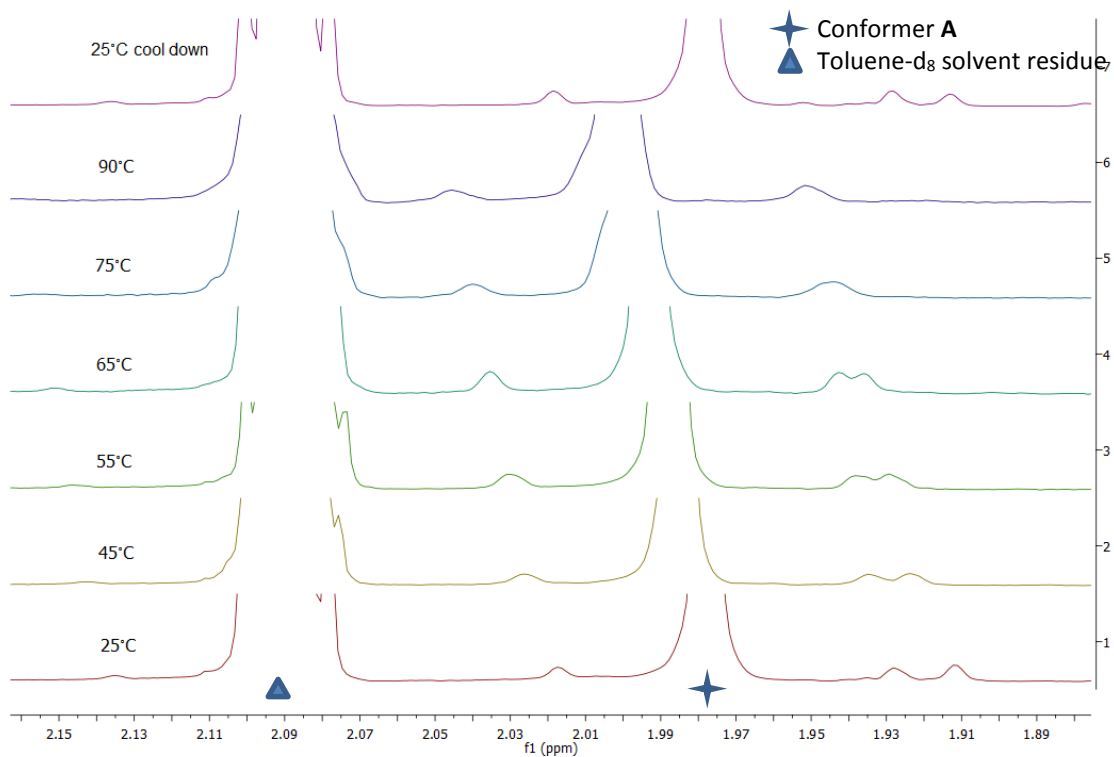

Supplement: c6dt00588h1.pdf [file c6dt00588h1.pdf]
